# Supplementary material for: Rational Design of DNA-Expressed Stabilized Native-Like HIV-1 Envelope Trimers
Source: PubMed Central journal article supplement (PMC6167709; doi:10.1016/j.celrep.2018.08.051), 2018-09-18
Supplement: mmc1.pdf [file mmc1.pdf]

**Cell Reports, Volume 24**

**Supplemental Information**

**Rational Design of DNA-Expressed**

**Stabilized Native-Like HIV-1 Envelope Trimers**

**Yoann Aldon, Paul F. McKay, Joel Allen, Gabriel Ozorowski, Réka Felföldiné Lévai, Monica Tolazzi, Paul Rogers, Linling He, Natalia de Val, Katalin Fábrián, Gabriella Scarlatti, Jiang Zhu, Andrew B. Ward, Max Crispin, and Robin J. Shattock**

# 1 SUPPLEMENTAL FIGURES

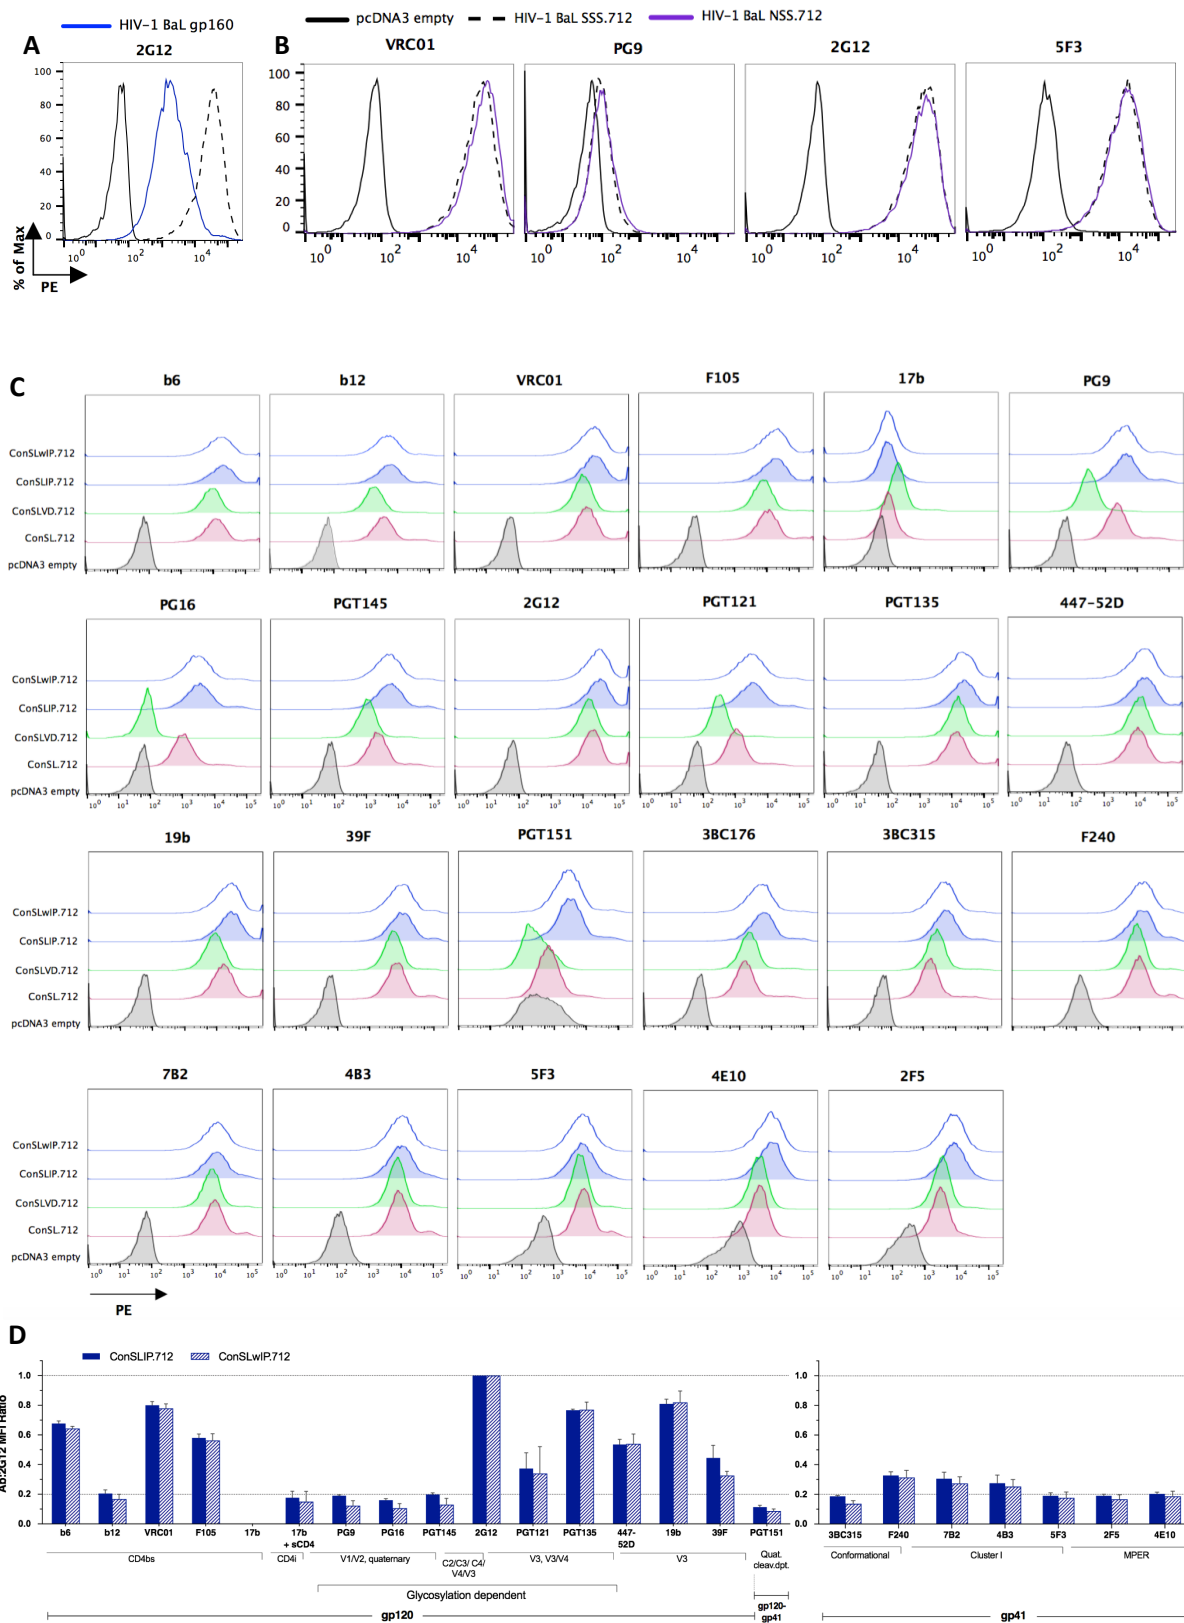

2 **Figure S1. Effects of truncation at position 712 and signal sequence on surface expression of BaL and**  
 3 **impact of IP, VD and linker orientation on the cleavage independent ConSL.712 design. Related to**  
 4 **Figures 2 and 3. (A) FC analysis of HIV-1 BaL Env comparing the expression levels of gp160 and truncated**  
 5 **version BaL SSS.712 transiently expressed in 293T.17 cells. Representative of  $n \geq 2$  independent experiments.**

6 **(B)** Comparison of native signal sequence (NSS) versus secretion signal sequence (SSS) and their impact on  
7 Env surface antigenicity in 293T.17 cells. 293T.17 cells transfected with a pcDNA3 empty vector were included  
8 as a negative control to determine each mAb background. Representative of  $n \geq 2$  independent experiments. **(C)**  
9 293T.17 cells were transiently transfected with the indicated constructs and traces were plotted in FlowJo.  
10 Representative of  $n \geq 2$  independent experiments. **(D)** Ab binding profile of ConSLIP.712 and ConSLwIP.712  
11 were analysed as in Figure 2. Error bars represent mean  $\pm$  SEM with  $n \geq 2$  independent experiments.

12

13

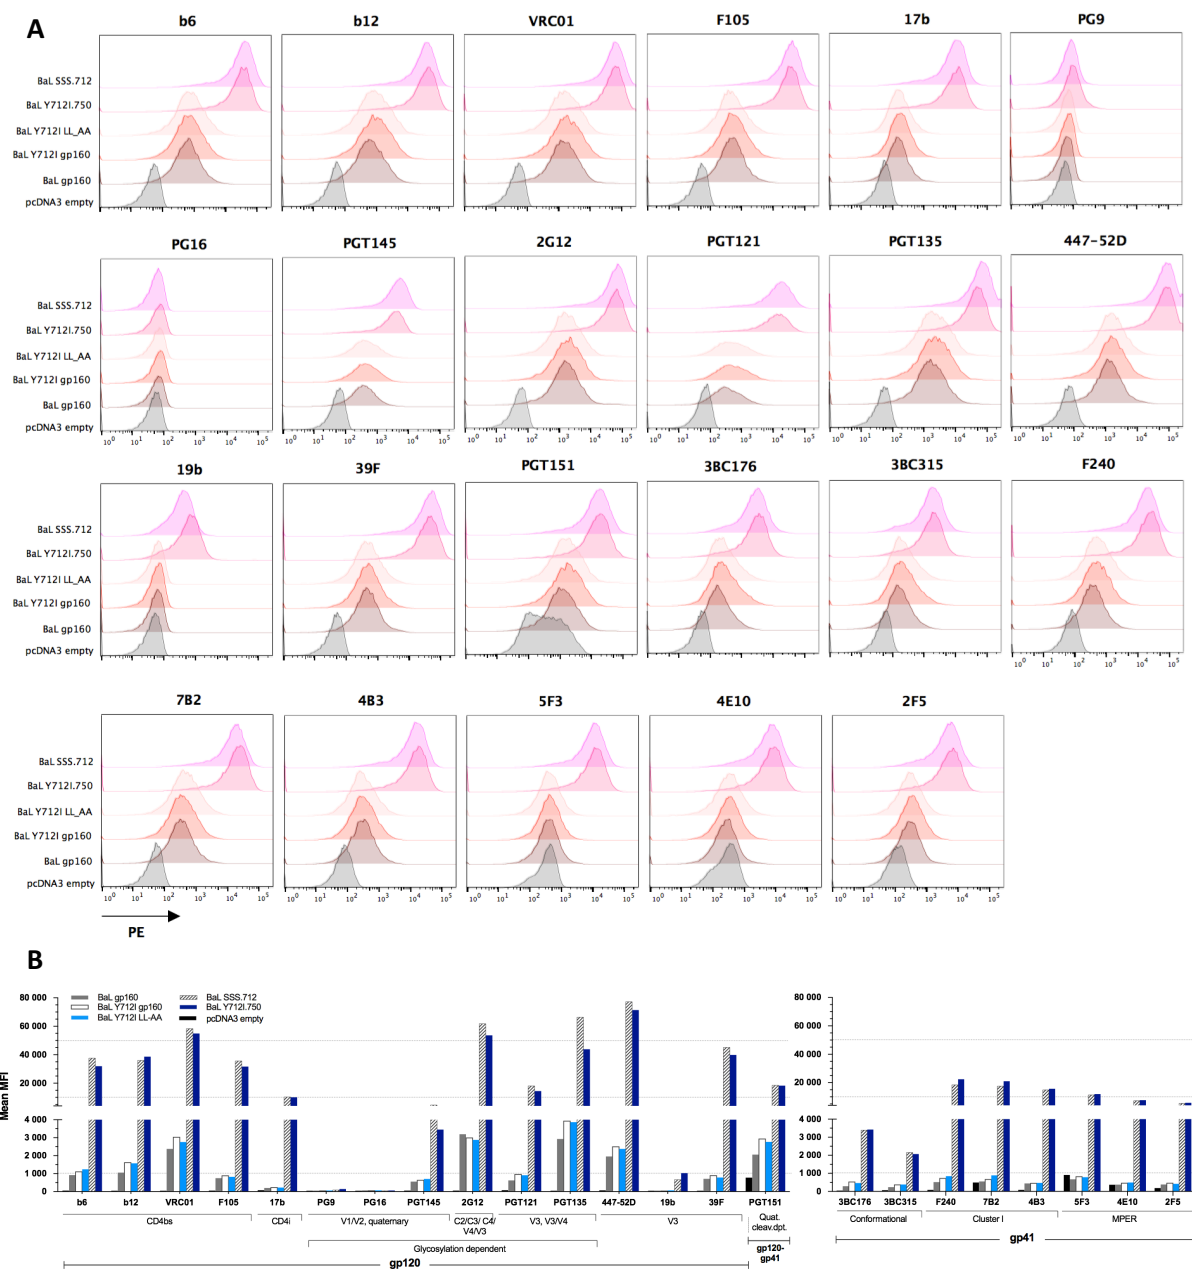

15 **Figure S2. Effect of the endocytosis/recycling motif mutations and CT truncations on BaL Env surface**  
 16 **expression. Related to Figure 3. (A) Traces overlay of extended BaL constructs FC data from Figure 3. (B)**  
 17 **Extended mAbs panel from Figure 3.B with mean MFI values plotted. Representative of  $n \geq 2$  independent**  
 18 **experiments.**





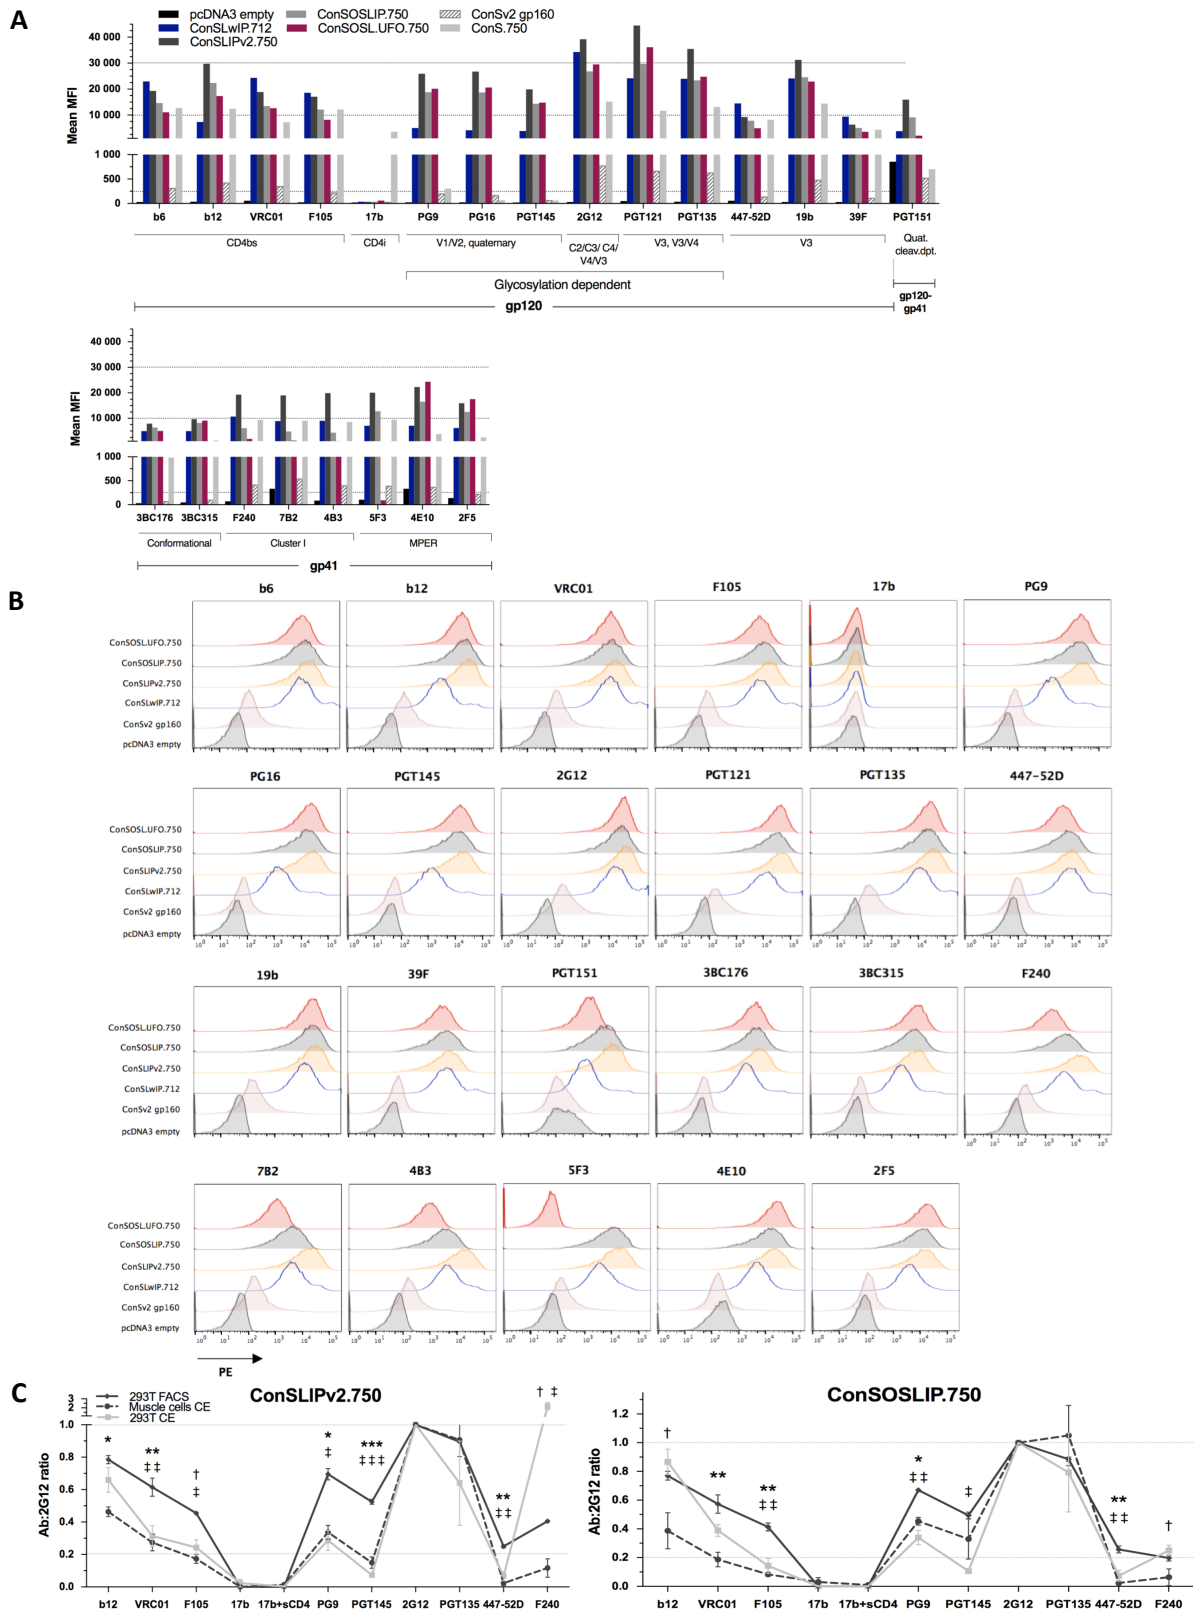

32 **Figure S4. Enhancement of bNAb binding and subsequent reduction of nNAb binding by gp41 HR1**  
 33 **stabilization - Flow cytometry and cell ELISA. Related to Figure 4.** (A) Mean MFI values corresponding to  
 34 the bar graph of Figure 4.A of Env constructs expressed in 293T.17 and analysed by FC for 23 mAb.  
 35 Representative of  $n \geq 2$  independent experiments (for ConSOSL.UFO.750  $n \geq 3$ ). (B) Traces overlay of the  
 36 corresponding experiment expressed in 293T.17 cells. Representative of  $n \geq 2$  independent experiments  
 37 (ConSOSL.UFO.750  $n \geq 3$ ). (C) Comparison of ConSLIPv2.750 and ConSOSLIP.750 epitope profiles in

38 muscle cell CE, 293T.17 CE and FC ( $n \geq 2$ ). One-way ANOVA with Sidak's multiple comparisons,  $p$  values:  
39 \* $<0.05$ , \*\* $<0.01$ , \*\*\* $<0.001$  where each sign in (C) compares: \*Muscle Cells CE vs. 293T.17 FC; † Muscle  
40 Cells CE vs. 293T.17 CE; ‡ 293T.17 FC vs. 293T CE.

41

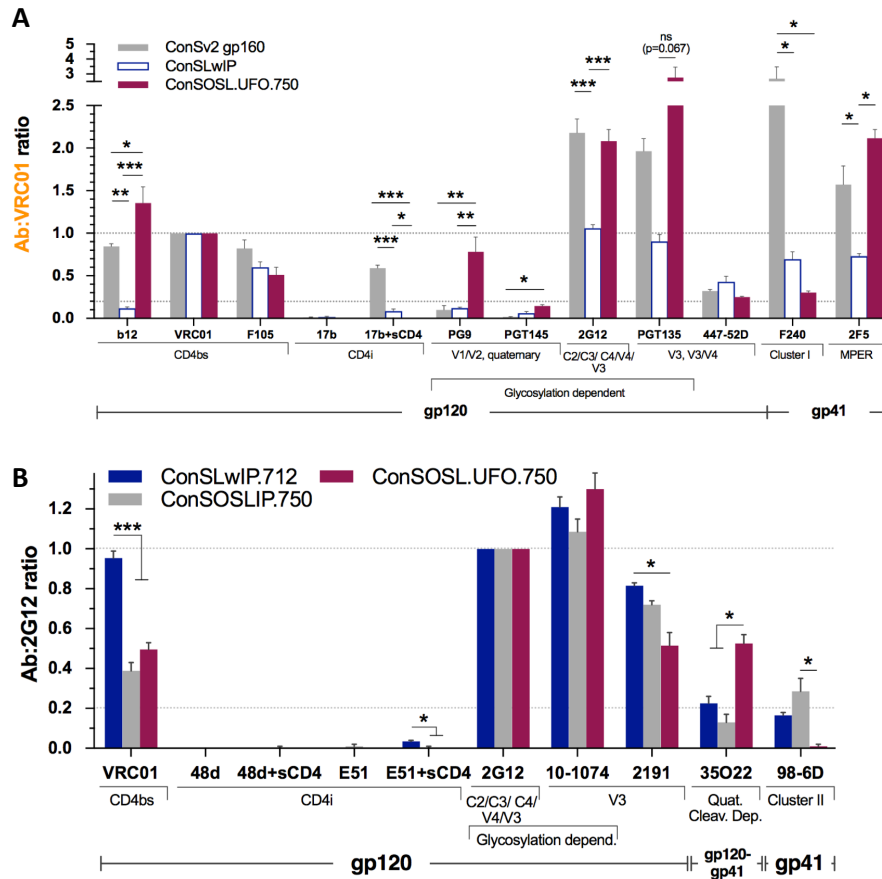

42 **Figure S5. Enhancement of bNAbs binding and subsequent reduction of nNAbs binding by gp41 HR1**  
 43 **stabilization – Cell ELISA. Related to Figure 4. (A)** 293T.17 CE assessing ConSv2 gp160, ConSLwIP.712  
 44 and ConSOSL.UFO.750 using mAb:VRC01 ratio to plot the mean  $\pm$  SEM values ( $n \geq 3$ , except ConSv2 gp160  
 45 PGT135  $n = 2$ ). **(B)** Comparison of ConSLwIP.712, ConSOSLIP.750 and ConSOSL.UFO.750 in 293T.17 CE  
 46 for mAb: VRC01, 48d (+/- sCD4), E51 (+/- sCD4), 2G12, 10-1074, 2191, 35022 and 98-6D ( $n \geq 2$ ). One-way  
 47 ANOVA with Sidak's multiple comparisons, p values: \* $<0.05$ , \*\* $<0.01$ , \*\*\* $<0.001$ .

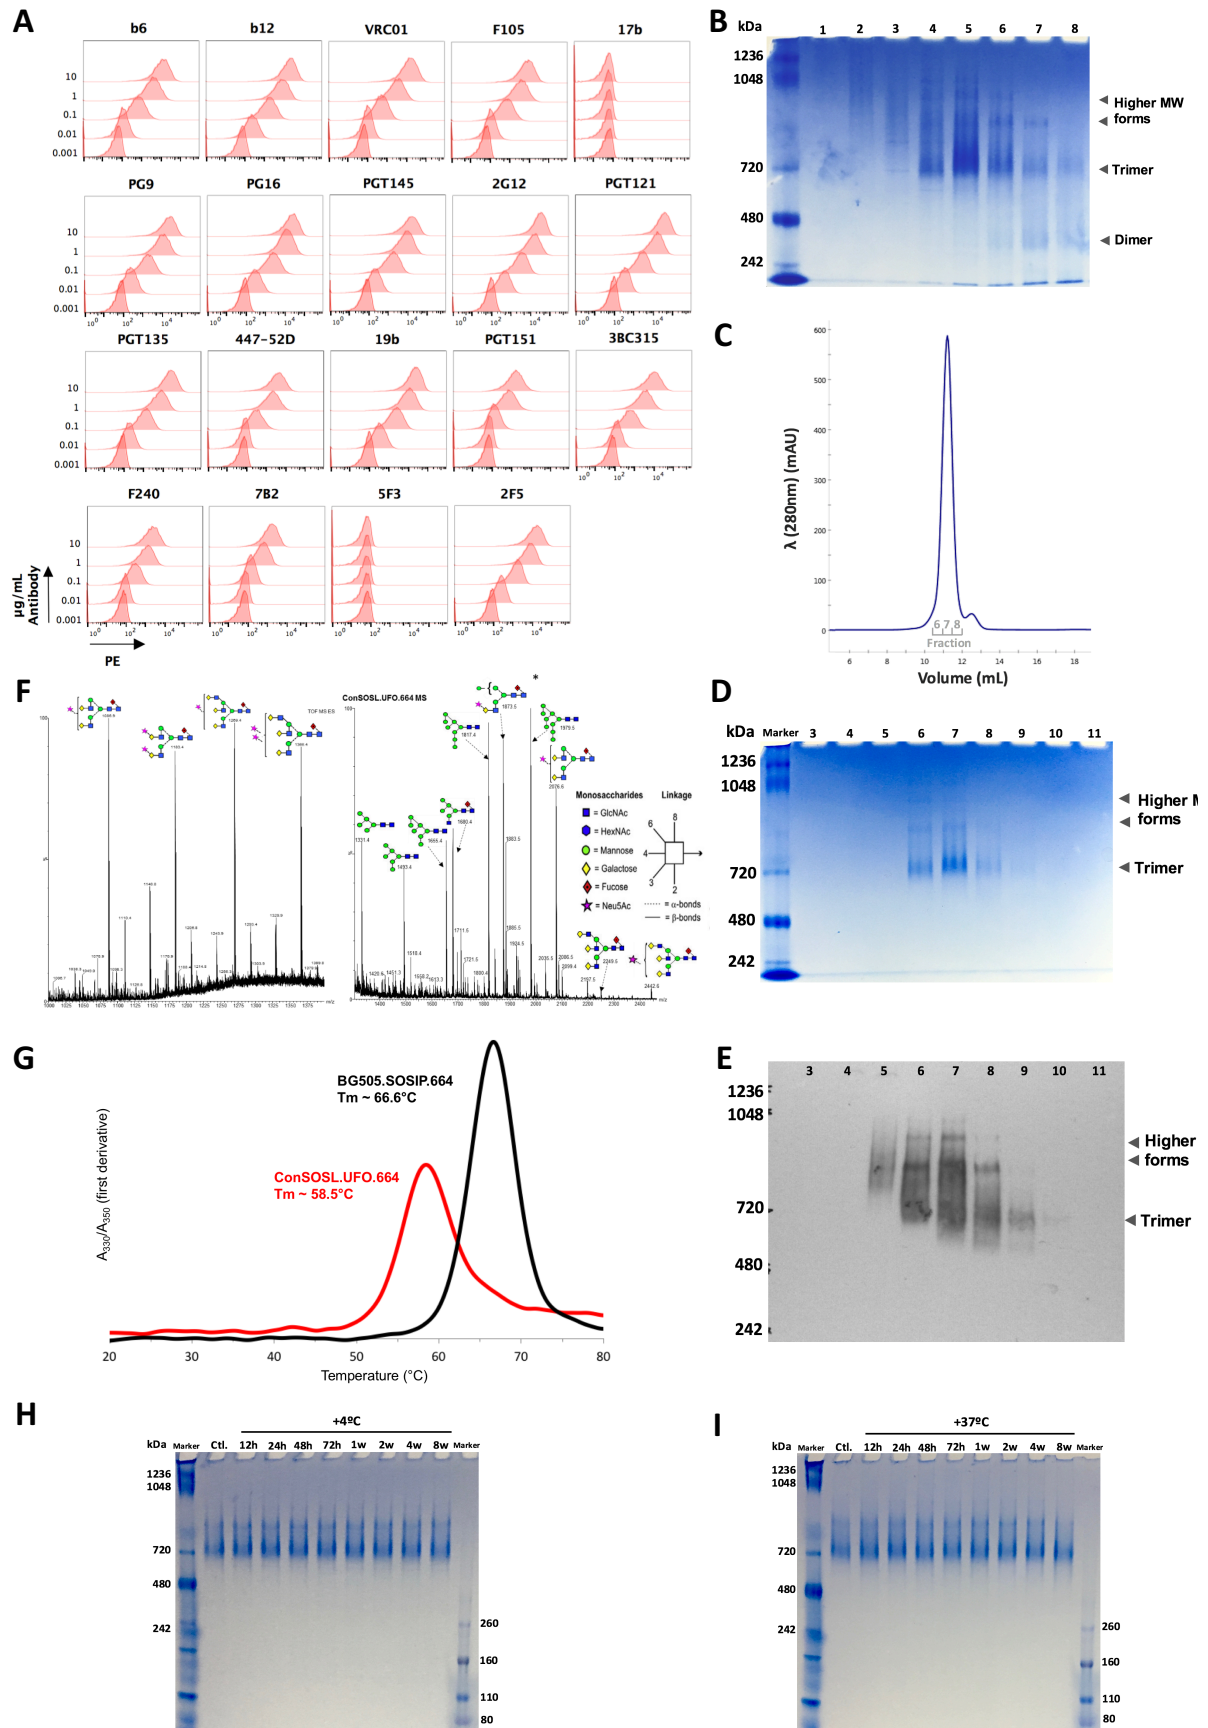

48 **Figure S6. Antibodies titration against ConSOSL.UFO.750 and structural and glycosylation analysis of**  
 49 **ConSOSL.UFO.664 Env trimers. Related to Figures 5 and 6. (A) Traces corresponding to the mean MFI**  
 50 **value plotted in Figure 5. Representative of n = 2 independent experiments. (B) Colloidal blue stain of a native**

51 gel running fractions of the SEC purification from Figure 6.A. **(C)** Fractions 4-6 of Figure 6.A were run a  
52 second time through a SEC column and the obtained SEC profile is shown. **(D)** Colloidal blue stain of a native  
53 gel running fractions of the SEC purification from **(C)**. **(E)** Native PAGE western blot of **(D)** using 2G12 (1  
54  $\mu\text{g/mL}$ ) for detection. **(B)-(E)** Representative of  $n \geq 3$  independent experiments. **(F)** Mass spectrometry spectra  
55 of singly (left panel) and doubly charged ions extracted using driftscope. Abundant glycan structures and larger  
56 complex glycans are labelled. The  $m/z=1873$  is a hybrid lacking a mannose on 6 arm, but both isomers are  
57 present. **(F)** Thermal stability assessment of ConSOSL.UFO.664 (red) using nanoDSF,  $T_m$  is indicated. BG505  
58 SOSIP.664 (black) trimer is also plotted for comparison. **(H)** Thermostability of ConSOSL.UFO.664 at  $+4^\circ\text{C}$   
59 and **(I)**  $+37^\circ\text{C}$  over 8 weeks, representative of  $n = 1$  experiment.  
60

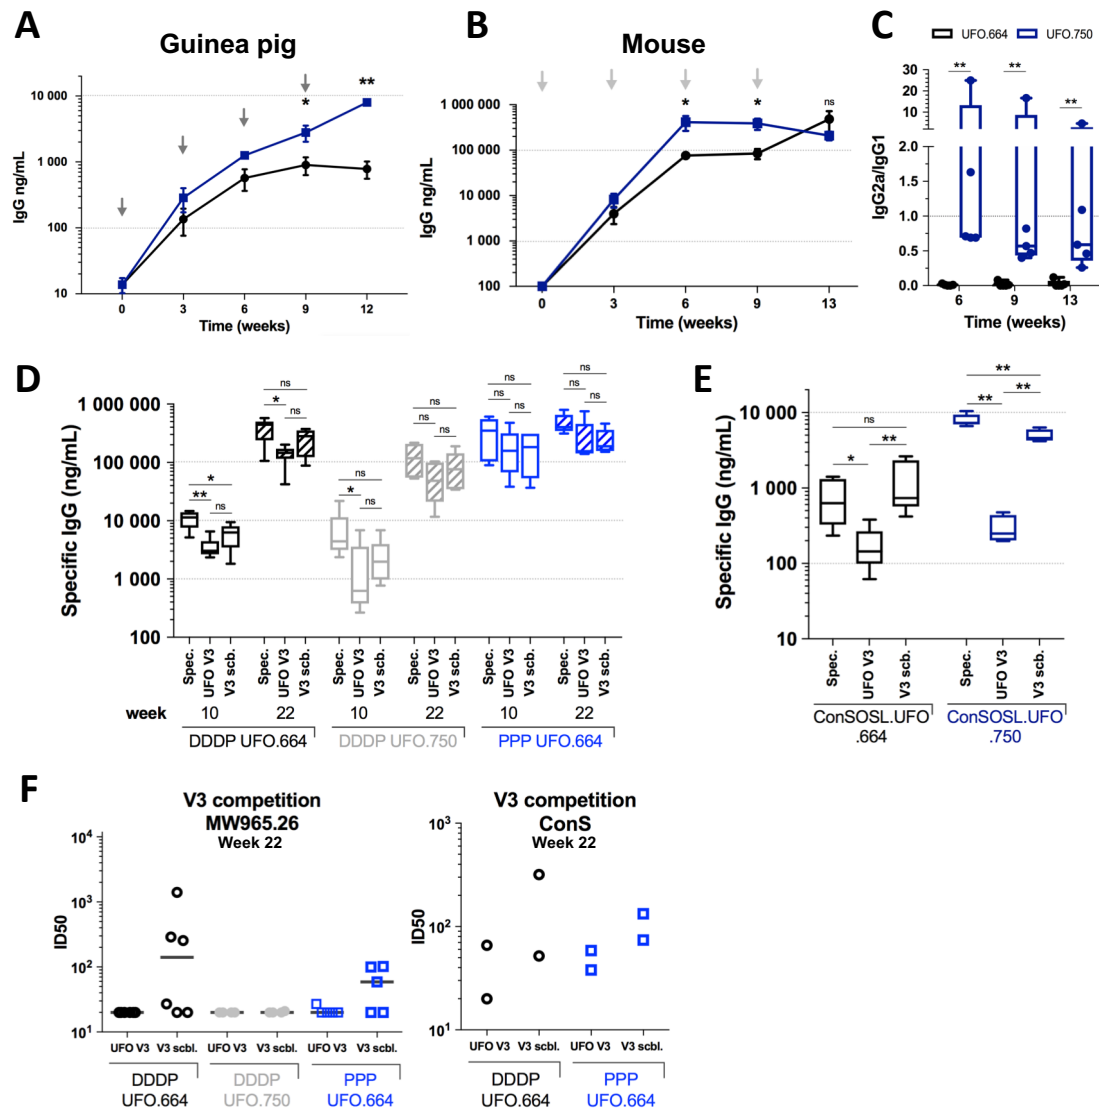

61

62 **Figure S7. Immunogenicity of ConSOSL.UFO design in Guinea pigs and mice and V3 specific response in**  
 63 **rabbits. Related to Figure 7. (A) Antigen specific serum IgG binding for DNA immunized Guinea pigs and (B)**  
 64 **mice with ConSOSL.UFO.750 plasmid (blue) and ConSOSL.UFO.664 plasmid (black). Binding assessed by**  
 65 **9E10 capture ELISA for Guinea pig's sera and by directly coated ConSOSL.UFO.664 trimers for mouse sera.**  
 66 **Arrows indicate immunization with DNA IM+EP. For (A) time points 0, 3 and 6, n = 6 animals per group, then**  
 67 **for time points 9 and 12, n = 5. Mice, n = 5 per group. Error bars represent mean  $\pm$  SEM values. (C) Mouse IgG1**  
 68 **and IgG2a antigen specific responses were assessed by ELISA and the IgG1/IgG2a ratio is shown here. (D) Rabbit**  
 69 **serum samples from week 10 and 22 and (E) Guinea pig's serum samples from week 12 were incubated 30min**  
 70 **prior loading onto the ELISA plates with 10ug/mL ConSOSL.UFO V3 cys-cyclised (UFO V3) peptide or MN.3**  
 71 **V3 scrambled linear (V3 scbl.) peptide as a control and the specific binding to ConSOSL.UFO.664 Myc-HIS**  
 72 **captured antigen measured. The total specific response is plotted and referred as 'Spec.' (F) Neutralization of**  
 73 **HIV-1 MW965.26 and ConS pseudoviruses in TZM-bl assay by rabbit neutralizer sera from week 22 in**  
 74 **competition with UFO V3 and V3 scbl. peptides. Data plotted as ID50 values (serum dilution that inhibits by 50%**  
 75 **infectivity). Unpaired t-test, p values: \* $<0.05$ , \*\* $<0.01$ .**  
 76







|                        |                                                              |     |
|------------------------|--------------------------------------------------------------|-----|
| BG505_gp160_DQ208458_1 | CPSVSTVQCTHGIKPVVSTQLLNGLSLAEEVMIIRSENITNNAKNIIVQFNTPVQINCTR | 297 |
| ConS_gp160             | CKNVSTVQCTHGIKPVVSTQLLNGLSLAEEFIIRSENITNNAKTIIVQLNESVEINCTR  | 295 |
| ConSOSIP_712           | CKNVSTVQCTHGIKPVVSTQLLNGLSLAEEVMIIRSENITNNAKNIIVQFNTPVQINCTR | 286 |
| ConSOSVD_712           | CKNVSTVQCTHGIKPVVSTQLLNGLSLAEEVMIIRSENITNNAKNIIVQFNTPVQINCTR | 286 |
| ConSL_712              | CKNVSTVQCTHGIKPVVSTQLLNGLSLAEEVMIIRSENITNNAKNIIVQFNTPVQINCTR | 286 |
| ConSLVD_712            | CKNVSTVQCTHGIKPVVSTQLLNGLSLAEEVMIIRSENITNNAKNIIVQFNTPVQINCTR | 286 |
| ConSLIP_712            | CKNVSTVQCTHGIKPVVSTQLLNGLSLAEEVMIIRSENITNNAKNIIVQFNTPVQINCTR | 286 |
| ConSLwIP_712           | CKNVSTVQCTHGIKPVVSTQLLNGLSLAEEVMIIRSENITNNAKNIIVQFNTPVQINCTR | 286 |
| ConSLIPv2_750          | CKNVSTVQCTHGIKPVVSTQLLNGLSLAEEFIIRSENITNNAKTIIVQLNESVEINCTR  | 286 |
| ConSOSLIP_750          | CKNVSTVQCTHGIKPVVSTQLLNGLSLAEEFIIRSENITNNAKTIIVQLNESVEINCTR  | 286 |
| ConSOSL_UFO_750        | CKNVSTVQCTHGIKPVVSTQLLNGLSLAEEFIIRSENITNNAKTIIVQLNESVEINCTR  | 286 |
| ConSOSL_UFO_664        | CKNVSTVQCTHGIKPVVSTQLLNGLSLAEEFIIRSENITNNAKTIIVQLNESVEINCTR  | 286 |
| ConSv2_gp160           | CKNVSTVQCTHGIKPVVSTQLLNGLSLAEEFIIRSENITNNAKTIIVQLNESVEINCTR  | 286 |

-----C2-Domain-----||  
 240 250 260 270 280 290

|                        |                                                                |     |
|------------------------|----------------------------------------------------------------|-----|
| BG505_gp160_DQ208458_1 | PNNNTRKSIIRIGPGQAFYATGDIIGDIRQAHCTVSKATWNETLGKVVVKQLRKHFGNNTII | 357 |
| ConS_gp160             | PNNNTRKSIIRIGPGQAFYATGDIIGDIRQAHCTVSGTKWNTLQOVVAKKLRHFHNKTI    | 354 |
| ConSOSIP_712           | PNNNTRKSIIRIGPGQAFYATGDIIGDIRQAHCTVSKATWNETLGKVVVKQLRKHFGNNTII | 346 |
| ConSOSVD_712           | PNNNTRKSIIRIGPGQAFYATGDIIGDIRQAHCTVSKATWNETLGKVVVKQLRKHFGNNTII | 346 |
| ConSL_712              | PNNNTRKSIIRIGPGQAFYATGDIIGDIRQAHCTVSKATWNETLGKVVVKQLRKHFGNNTII | 346 |
| ConSLVD_712            | PNNNTRKSIIRIGPGQAFYATGDIIGDIRQAHCTVSKATWNETLGKVVVKQLRKHFGNNTII | 346 |
| ConSLIP_712            | PNNNTRKSIIRIGPGQAFYATGDIIGDIRQAHCTVSKATWNETLGKVVVKQLRKHFGNNTII | 346 |
| ConSLwIP_712           | PNNNTRKSIIRIGPGQAFYATGDIIGDIRQAHCTVSKATWNETLGKVVVKQLRKHFGNNTII | 346 |
| ConSLIPv2_750          | PNNNTRKSIIRIGPGQAFYATGDIIGDIRQAHCTVSGTKWNTLQOVVAKKLRHFHNKTI    | 345 |
| ConSOSLIP_750          | PNNNTRKSIIRIGPGQAFYATGDIIGDIRQAHCTVSGTKWNTLQOVVAKKLRHFHNKTI    | 345 |
| ConSOSL_UFO_750        | PNNNTRKSIIRIGPGQAFYATGDIIGDIRQAHCTVSGTKWNTLQOVVAKKLRHFHNKTI    | 345 |
| ConSOSL_UFO_664        | PNNNTRKSIIRIGPGQAFYATGDIIGDIRQAHCTVSGTKWNTLQOVVAKKLRHFHNKTI    | 345 |
| ConSv2_gp160           | PNNNTRKSIIRIGPGQAFYATGDIIGDIRQAHCTVSGTKWNTLQOVVAKKLRHFHNKTI    | 345 |

-----V3-Loop-----||-----C3-Domain-----  
 300 308/311 320 330 340 350

|                        |                                                               |     |
|------------------------|---------------------------------------------------------------|-----|
| BG505_gp160_DQ208458_1 | RFANSSGGDLEVTTHSFNCGGEFFYCNTSGLFNSTWISNTSVQGSNSTGSNDISITLPCRI | 417 |
| ConS_gp160             | IFKPSGGDLEVTTHSFNCRGEFFYCNTSGLFNSTWIGNGTKN---NNNTNDTITLPCRI   | 411 |
| ConSOSIP_712           | RFANSSGGDLEVTTHSFNCGGEFFYCNTSGLFNSTWIGNGTKN---NNNTNDTITLPCRI  | 403 |
| ConSOSVD_712           | RFANSSGGDLEVTTHSFNCGGEFFYCNTSGLFNSTWIGNGTKN---NNNTNDTITLPCRI  | 403 |
| ConSL_712              | RFANSSGGDLEVTTHSFNCGGEFFYCNTSGLFNSTWIGNGTKN---NNNTNDTITLPCRI  | 403 |
| ConSLVD_712            | RFANSSGGDLEVTTHSFNCGGEFFYCNTSGLFNSTWIGNGTKN---NNNTNDTITLPCRI  | 403 |
| ConSLIP_712            | RFANSSGGDLEVTTHSFNCGGEFFYCNTSGLFNSTWIGNGTKN---NNNTNDTITLPCRI  | 403 |
| ConSLwIP_712           | RFANSSGGDLEVTTHSFNCGGEFFYCNTSGLFNSTWIGNGTKN---NNNTNDTITLPCRI  | 403 |
| ConSLIPv2_750          | IFNPSGGDLEVTTHSFNCGGEFFYCNTSGLFNSTWIGNGTKN---NNNTNDTITLPCRI   | 402 |
| ConSOSLIP_750          | IFNPSGGDLEVTTHSFNCGGEFFYCNTSGLFNSTWIGNGTKN---NNNTNDTITLPCRI   | 402 |
| ConSOSL_UFO_750        | IFNPSGGDLEVTTHSFNCGGEFFYCNTSGLFNSTWIGNGTKN---NNNTNDTITLPCRI   | 402 |
| ConSOSL_UFO_664        | IFNPSGGDLEVTTHSFNCGGEFFYCNTSGLFNSTWIGNGTKN---NNNTNDTITLPCRI   | 402 |
| ConSv2_gp160           | IFNPSGGDLEVTTHSFNCGGEFFYCNTSGLFNSTWIGNGTKN---NNNTNDTITLPCRI   | 402 |

-----V4-Loop-----||  
 360 370 380 390 399/401 410 420

|                        |                                                              |     |
|------------------------|--------------------------------------------------------------|-----|
| BG505_gp160_DQ208458_1 | KQIINMWQRIGQAMYAPPIQGVIRCVSNITGLLLTRDGGSTNS-TTETFRPGGGDMRDNW | 476 |
| ConS_gp160             | KQIINMWQGVQAMYAPPIEGKITCKSNITGLLLTRDGGNNNTNETETFRPGGGDMRDNW  | 471 |
| ConSOSIP_712           | KQIINMWQRIGQAMYAPPIQGVIRCVSNITGLLLTRDGGSTNS-TTETFRPGGGDMRDNW | 462 |
| ConSOSVD_712           | KQIINMWQRIGQAMYAPPIQGVIRCVSNITGLLLTRDGGSTNS-TTETFRPGGGDMRDNW | 462 |
| ConSL_712              | KQIINMWQRIGQAMYAPPIQGVIRCVSNITGLLLTRDGGSTNS-TTETFRPGGGDMRDNW | 462 |
| ConSLVD_712            | KQIINMWQRIGQAMYAPPIQGVIRCVSNITGLLLTRDGGSTNS-TTETFRPGGGDMRDNW | 462 |
| ConSLIP_712            | KQIINMWQRIGQAMYAPPIQGVIRCVSNITGLLLTRDGGSTNS-TTETFRPGGGDMRDNW | 462 |
| ConSLwIP_712           | KQIINMWQRIGQAMYAPPIQGVIRCVSNITGLLLTRDGGSTNS-TTETFRPGGGDMRDNW | 462 |
| ConSLIPv2_750          | KQIINMWQRVGQAMYAPPIQGVIRCVSNITGLLLTRDGGNNNTNETETFRPGGGDMRDNW | 462 |
| ConSOSLIP_750          | KQIINMWQRVGQAMYAPPIQGVIRCVSNITGLLLTRDGGNNNTNETETFRPGGGDMRDNW | 462 |
| ConSOSL_UFO_750        | KQIINMWQRVGQAMYAPPIQGVIRCVSNITGLLLTRDGGNNNTNETETFRPGGGDMRDNW | 462 |
| ConSOSL_UFO_664        | KQIINMWQRVGQAMYAPPIQGVIRCVSNITGLLLTRDGGNNNTNETETFRPGGGDMRDNW | 462 |
| ConSv2_gp160           | KQIINMWQRVGQAMYAPPIQGVIRCVSNITGLLLTRDGGNNNTNETETFRPGGGDMRDNW | 462 |

-----C4-Domain-----||V5Lp||-b24-||-----C5-  
 430 440 450 460 470 479

|                        |                                                               |     |
|------------------------|---------------------------------------------------------------|-----|
| BG505_gp160_DQ208458_1 | RSELYKYKVVVKIEPLGVAPTAKRRRVVGREKR-----AVGIGAVFLGFLGAAGST      | 526 |
| ConS_gp160             | RSELYKYKVVVKIEPLGVAPTAKRRRVVREKR-----AVGIGAVFLGFLGAAGST       | 521 |
| ConSOSIP_712           | RSELYKYKVVVKIEPLGVAPTRCKRRRVVRRRR-----RRAVGIGAVFLGFLGAAGST    | 514 |
| ConSOSVD_712           | RSELYKYKVVVKIEPLGVAPTRCKRRRVVRRRR-----RRAVGIGAVFLGFLGAAGST    | 514 |
| ConSL_712              | RSELYKYKVVVKIEPLGVAPTAKRRRVVSEKRSGGGGSGGGGAVGIGAVFLGFLGAAGST  | 522 |
| ConSLVD_712            | RSELYKYKVVVKIEPLGVAPTAKRRRVVSEKRSGGGGSGGGGAVGIGAVFLGFLGAAGST  | 522 |
| ConSLIP_712            | RSELYKYKVVVKIEPLGVAPTAKRRRVVSEKRSGGGGSGGGGAVGIGAVFLGFLGAAGST  | 522 |
| ConSLwIP_712           | RSELYKYKVVVKIEPLGVAPTAKRRRVVSEKRSGGGGSGGGGAVGIGAVFLGFLGAAGST  | 522 |
| ConSLIPv2_750          | RSELYKYKVVVKIEPLGVAPTAKRRRVVSEKRSGGGGSGGGGAVGIGAVFLGFLGAAGST  | 522 |
| ConSOSLIP_750          | RSELYKYKVVVKIEPLGVAPTRCKRRRVV-----GGGGSGGGGAVGIGAVFLGFLGAAGST | 518 |
| ConSOSL_UFO_750        | RSELYKYKVVVKIEPLGVAPTRCKRRRVV-----GGGGSGGGGAVGIGAVFLGFLGAAGST | 518 |
| ConSOSL_UFO_664        | RSELYKYKVVVKIEPLGVAPTRCKRRRVV-----GGGGSGGGGAVGIGAVFLGFLGAAGST | 518 |
| ConSv2_gp160           | RSELYKYKVVVKIEPLGVAPTAKRRRVVREKR-----AVGIGAVFLGFLGAAGST       | 512 |

-----C5-Domain-----|-----HR-1-----  
 480 490 500 510 520

|                        |                                                             |     |
|------------------------|-------------------------------------------------------------|-----|
| BG505_gp160_DQ208458_1 | MGAASMTLTVQARNLLSGIVQQSNLLRAIEAQQHLLKLTWVGIKQLQARVLAVERYLRD | 586 |
| ConS_gp160             | MGAASITLTVQARQLLSGIVQQSNLLRAIEAQQHLLQLTWVGIKQLQARVLAVERYLRD | 581 |
| ConSOSIP_712           | MGAASMTLTVQARNLLSGIVQQSNLLRAIEAQQHLLKLTWVGIKQLQARVLAVERYLRD | 574 |
| ConSOSVD_712           | MGAASMTLTVQARNLLSGIVQQSNLLRAIEAQQHLLKLTWVGIKQLQARVLAVERYLRD | 574 |
| ConSL_712              | MGAASMTLTVQARNLLSGIVQQSNLLRAIEAQQHLLKLTWVGIKQLQARVLAVERYLRD | 582 |
| ConSLVD_712            | MGAASMTLTVQARNLLSGIVQQSNLLRAIEAQQHLLKLTWVGIKQLQARVLAVERYLRD | 582 |
| ConSLIP_712            | MGAASMTLTVQARNLLSGIVQQSNLLRAIEAQQHLLKLTWVGIKQLQARVLAVERYLRD | 582 |
| ConSLwIP_712           | MGAASMTLTVQARNLLSGIVQQSNLLRAIEAQQHLLKLTWVGIKQLQARVLAVERYLRD | 582 |
| ConSLIPv2_750          | MGAASMTLTVQARNLLSGIVQQSNLLRAIEAQQHLLKLTWVGIKQLQARVLAVERYLRD | 582 |
| ConSOSLIP_750          | MGAASMTLTVQARNLLSGIVQQSNLLRAIEAQQHLLQLTWVGIKQLQARVLAVERYLRD | 578 |
| ConSOSL_UFO_750        | MGAASMTLTVQARNLLSGIVQQSNLLRAIEAQQHLLQLTWVGIKQLQARVLAVERYLRD | 565 |
| ConSOSL_UFO_664        | MGAASMTLTVQARNLLSGIVQQSNLLRAIEAQQHLLQLTWVGIKQLQARVLAVERYLRD | 565 |
| ConSv2_gp160           | MGAASMTLTVQARNLLSGIVQQSNLLRAIEAQQHLLQLTWVGIKQLQARVLAVERYLRD | 572 |

-----Heptad-Repeat-Helices-1-----  
 530 540 550 560 570 580 589

|                        |                                                             |     |
|------------------------|-------------------------------------------------------------|-----|
| BG505_gp160_DQ208458_1 | QLLGIWGC SGKLICTTNPVWSSWSNRNLSEIWDNMTWLQWDKEISNYTQIIYGLLEES | 646 |
| ConS_gp160             | QLLGIWGC SGKLICTTNPVWSSWSNRNLSEIWDNMTWMEWEREINNYTDIIYSLIEES | 641 |
| ConSOSIP_712           | QLLGIWGC SGKLICTTNPVWSSWSNRNLSEIWDNMTWLQWDKEISNYTQIIYGLLEES | 634 |
| ConSOSVD_712           | QLLGIWGC SGKLICTTNPVWSSWSNRNLSEIWDNMTWLQWDKEISNYTQIIYGLLEES | 634 |
| ConSL_712              | QLLGIWGC SGKLICTTNPVWSSWSNRNLSEIWDNMTWLQWDKEISNYTQIIYGLLEES | 642 |
| ConSLVD_712            | QLLGIWGC SGKLICTTNPVWSSWSNRNLSEIWDNMTWLQWDKEISNYTQIIYGLLEES | 642 |
| ConSLIP_712            | QLLGIWGC SGKLICTTNPVWSSWSNRNLSEIWDNMTWLQWDKEISNYTQIIYGLLEES | 642 |
| ConSLwIP_712           | QLLGIWGC SGKLICTTNPVWSSWSNRNLSEIWDNMTWLQWDKEISNYTQIIYGLLEES | 642 |
| ConSLIPv2_750          | QLLGIWGC SGKLICTTNPVWSSWSNRNLSEIWDNMTWMEWDKEINNYTDIIYSLIEES | 642 |
| ConSOSLIP_750          | QLLGIWGC SGKLICTTNPVWSSWSNRNLSEIWDNMTWMEWDKEINNYTDIIYSLIEES | 638 |
| ConSOSL_UFO_750        | QLLGIWGC SGKLICTTNPVWSSWSNRNLSEIWDNMTWMEWDKEINNYTDIIYSLIEES | 625 |
| ConSOSL_UFO_664        | QLLGIWGC SGKLICTTNPVWSSWSNRNLSEIWDNMTWMEWDKEINNYTDIIYSLIEES | 625 |
| ConSv2_gp160           | QLLGIWGC SGKLICTTNPVWSSWSNRNLSEIWDNMTWMEWDKEINNYTDIIYSLIEES | 632 |

-----|CC-Ip|-----Heptad-Repeat-Helices-2-----  
 590 600 610 620 630 640 649

|                        |                                                               |     |
|------------------------|---------------------------------------------------------------|-----|
| BG505_gp160_DQ208458_1 | QNQQEKNEQDLLALDKWASLWNWFDI SNWLWYIKIFIMIVGGLIGLRIVFAVLSVIHRVR | 706 |
| ConS_gp160             | QNQQEKNEQDLLALDKWASLWNWFDI SNWLWYIKIFIMIVGGLIGLRIVFAVLSIVNVR  | 701 |
| ConSOSIP_712           | QNQQEKNEQDLLALDKWASLWNWFDI SNWLWYIKIFIMIVGGLIGLRIVFAVLSVIHRVR | 694 |
| ConSOSVD_712           | QNQQEKNEQDLLALDKWASLWNWFDI SNWLWYIKIFIMIVGGLIGLRIVFAVLSVIHRVR | 694 |
| ConSL_712              | QNQQEKNEQDLLALDKWASLWNWFDI SNWLWYIKIFIMIVGGLIGLRIVFAVLSVIHRVR | 702 |
| ConSLVD_712            | QNQQEKNEQDLLALDKWASLWNWFDI SNWLWYIKIFIMIVGGLIGLRIVFAVLSVIHRVR | 702 |
| ConSLIP_712            | QNQQEKNEQDLLALDKWASLWNWFDI SNWLWYIKIFIMIVGGLIGLRIVFAVLSVIHRVR | 702 |
| ConSLwIP_712           | QNQQEKNEQDLLALDKWASLWNWFDI SNWLWYIKIFIMIVGGLIGLRIVFAVLSVIHRVR | 702 |
| ConSLIPv2_750          | QNQQEKNEQDLLALDKWASLWNWFDI SNWLWYIKIFIMIVGGLIGLRIVFAVLSIVNVR  | 702 |
| ConSOSLIP_750          | QNQQEKNEQDLLALDKWASLWNWFDI SNWLWYIKIFIMIVGGLIGLRIVFAVLSIVNVR  | 698 |
| ConSOSL_UFO_750        | QNQQEKNEQDLLALDKWASLWNWFDI SNWLWYIKIFIMIVGGLIGLRIVFAVLSIVNVR  | 685 |
| ConSOSL_UFO_664        | QNQQEKNEQDLLALDKWASLWNWFDI SNWLWYIKIFIMIVGGLIGLRIVFAVLSIVNVR  | 640 |
| ConSv2_gp160           | QNQQEKNEQDLLALDKWASLWNWFDI SNWLWYIKIFIMIVGGLIGLRIVFAVLSIVNVR  | 692 |

-----|-----MPER-----|-----TM-Domain-----|-----  
 650 660 670 680 690 700 709

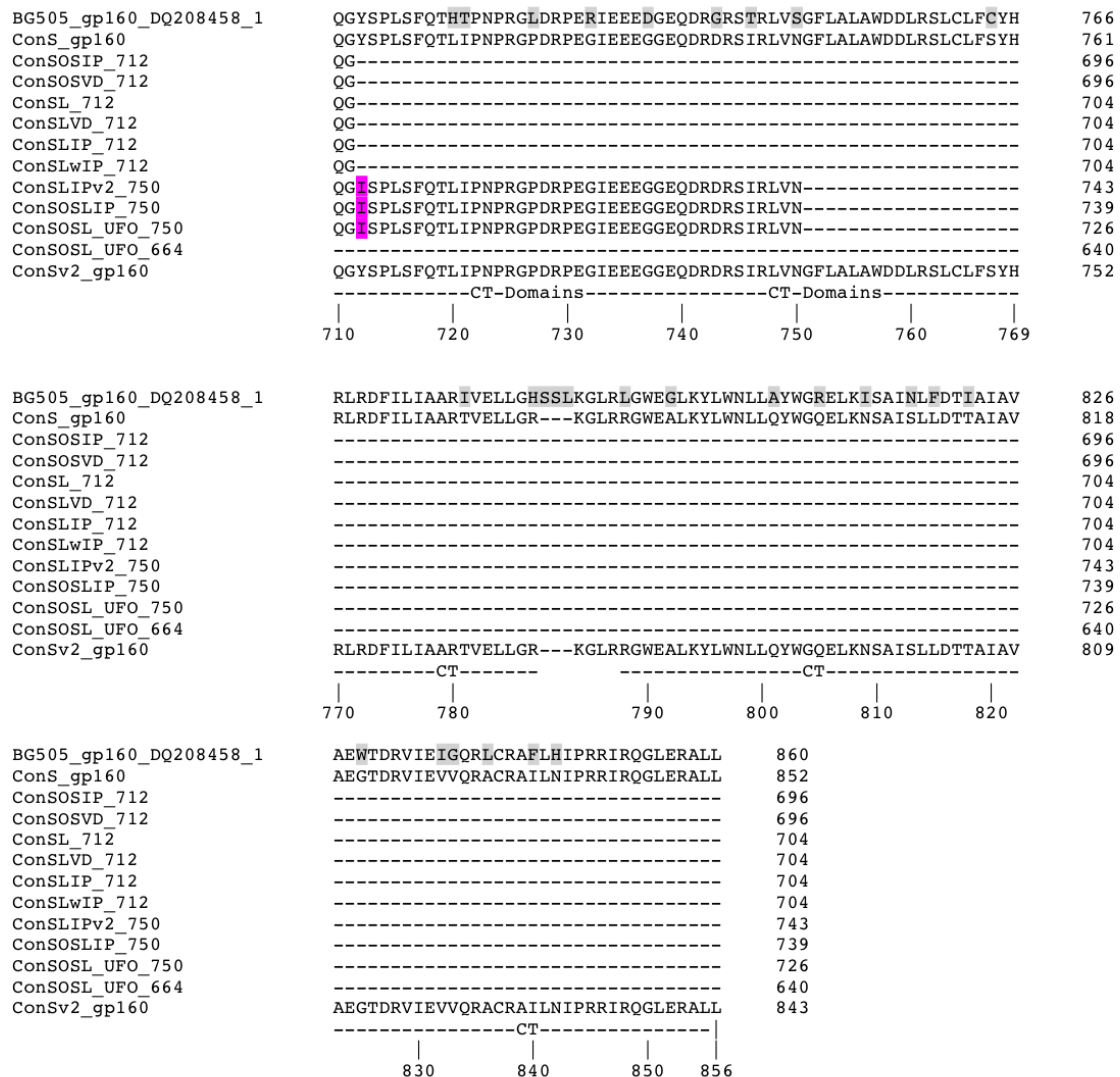

## B. ConSOSL.UFO.750

MDRAKLLLLLLLLLLPQAQAVENLWVTVYGVVWVWDAETTLFCASDAKAYDTEVRNVWATHACVPTDPNPQEIIVLENTNFNMWKNMVE  
 EQMHTDIISLWDQSLKPCVKLTPLCVTLNCTNVNVTNTNTNTEEKGEIKNCSFNITTELRLDKKKVYALFYRLDVPIDNNNNNSNYRLI  
 NCNTSAITQACPKVVFEPPIPIHYCAPAGFAILKCNKKFNGTGPKKNVSTVQCETHGKIPVSTQLLNGSLAEEEEIIIRSENITNNAKTI  
 VQLNESVEINCTRPNNNRKRSIRIGPGQWIFYATGDIIGDIRQAHCNISGKWNKTLQVVKKLRHFNNKTIIFNPSSGGDLEITTHSFNC  
 GGEFFYCNTSGLFNSTWIGNGTKNNNNTNDTITLPCRIKQIINMWQVRVQPMYAPPIQGKIRCVSNITGLLLTRDGGNNNTNETETFRPGG  
 GMDRDNWRSELYKYKVVKIEPLGVAPTRCKRRVVEGGGGSGGGGSAVIGAVFLGFLGAAGSTMGAASMTLTVQARNLLSGGSGSGSGSTV  
 WGIKQLQARVLAVERYLRDQQLGIWGCSSGKLICTNVPWNSSWSNKSQDEIWDNMTWMEWDKEINNYTDIISLYLIEESQOQEKNEQDLL  
 ALDKWASLWNWFDITNWLWYIKIFIMIVGGLIGLRIVFAVLSIVNVRVQGISPLSFQTLIPNPRGPDPRPEGIEEEEGGEQDRDRSIRLVN\*

81

82 **Data S1. Sequence alignment and numbering using HXB2 numbering reference. Related to Figure 1. (A)**

83 Sequences were aligned using Clustal Omega online tool (EMBL-EBI). HXB2 numbering was attributed

84 according to the lanl database using the HXB2 K03455 reference sequence

85 (<https://www.hiv.lanl.gov/content/sequence/HIV/REVIEWS/HXB2.html>). Highlighted in grey are the amino

86 acid introduced from BG505 (or specific to BG505), in yellow the amino acid reverted to the ConS gp160

87 sequence (or specific to ConS gp160) while pink highlighted amino acids indicate stabilization substitutions.

88 The optimized cleavage site RRRRRR is coloured in blue and both cleavage site linker (SG<sub>4</sub>)<sub>2</sub> and (G<sub>4</sub>S)<sub>2</sub> are

89 coloured in purple and pink respectively. (B) ConSOSL.UFO.750 amino acid sequence.
